# Supplementary material for: An electrochemiluminescence-supramolecular approach to sarcosine detection for early diagnosis of prostate cancer
Source: Royal Society of Chemistry journal article supplement (doi:10.1039/c5fd00096c), 2015-01-01
Supplement: c5fd00096c1.pdf [file c5fd00096c1.pdf]

## **An electrochemiluminescent-supramolecular approach to sarcosine detection for early diagnosis of prostate cancer.**

Giovanni Valenti,<sup>a</sup> Enrico Rampazzo,<sup>a</sup> Elisa Biavardi,<sup>b</sup> Elena Villani,<sup>a</sup> Giulio Fracasso,<sup>c</sup> Massimo Marcaccio,<sup>a</sup> Federico Bertani,<sup>b</sup> Dunia Ramarli,<sup>c</sup> Enrico Dalcanale,<sup>b</sup> Francesco Paolucci,<sup>a</sup> and Luca Prodi.\*<sup>a</sup>

---

<sup>a</sup> Department of Chemistry "G. Ciamician", University of Bologna, Via Selmi 2, 40126 Bologna, Italy; E-mail: luca.prodi@unibo.it

<sup>b</sup> Dipartimento di Chimica Organica e Industriale, University of Parma and Consorzio Interuniversitario Nazionale per la Scienza e Tecnologia dei Materiali Unità di Ricerca Parma, Parco Area delle Scienze 17/A, 43124 Parma, Italy; E-mail: enrico.dalcanale@unipr.it

<sup>c</sup> Department of Pathology and Diagnostics, Immunology Section, University of Verona, Verona, Italy

## **Electronic Supplementary Information (ESI)**

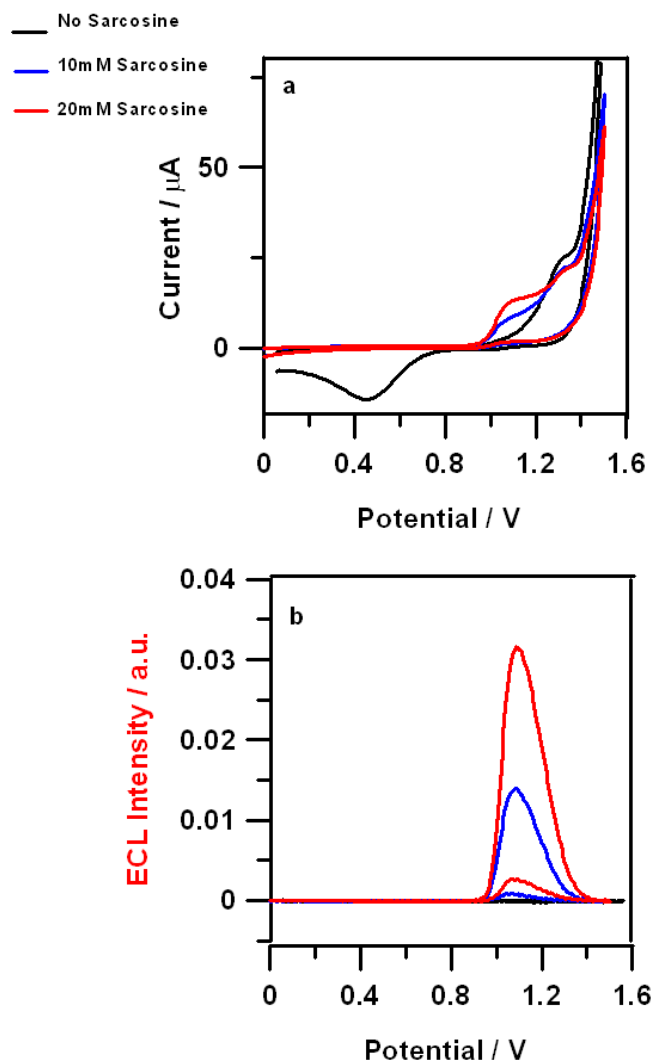

**Figure S1** Cyclic Voltammetry (a) and ECL of Ru(bpy)<sub>3</sub><sup>2+</sup> 1 mM solution in phosphate buffer without (black line) and with 10 mM (blue line) and 20mM (red line) of sarcosine.

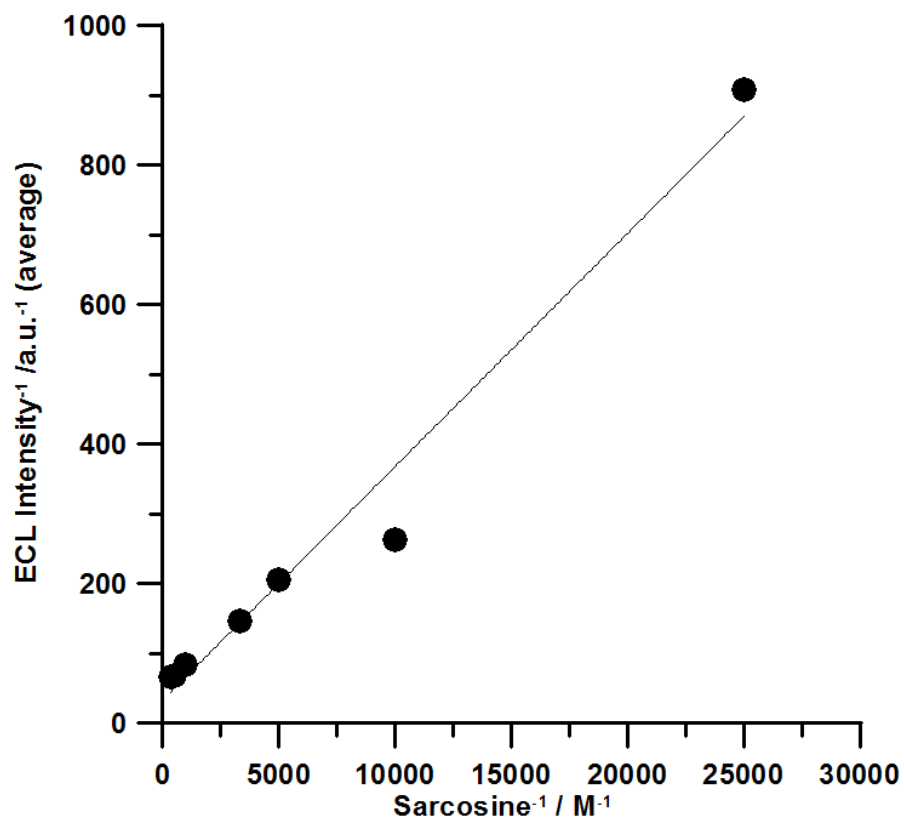

**Figure S2** Linearization of the ECL intensity vs sarcosine concentration (50, 100, 200, 300, 400, 1000, 2000, 3000  $\mu\text{M}$ ), obtain from PB (pH 9) solution, 20  $\mu\text{M}$   $\text{Ru}(\text{bpy})_3^{2+}$  the potentials applied versus Ag/AgCl is 1.45 V. MMBs are previously functionalize with the **Tiiii**, after the **Tiiii@MMB** were incubate with the sarcosine at pH 5 for 1 h. The **Tiiii@MMB** -Sarcosine hydrochloride complex were washed three times with 0.05% Tween 20 and PB pH 5. Inset, the linear part in the calibration curve. Error bars show standard deviations (n=3).
